# Supplementary material
Source: MDPI journal article supplement (https://www.mdpi.com/2072-4292/12/17/2686)
Supplement: s1 [file s1]

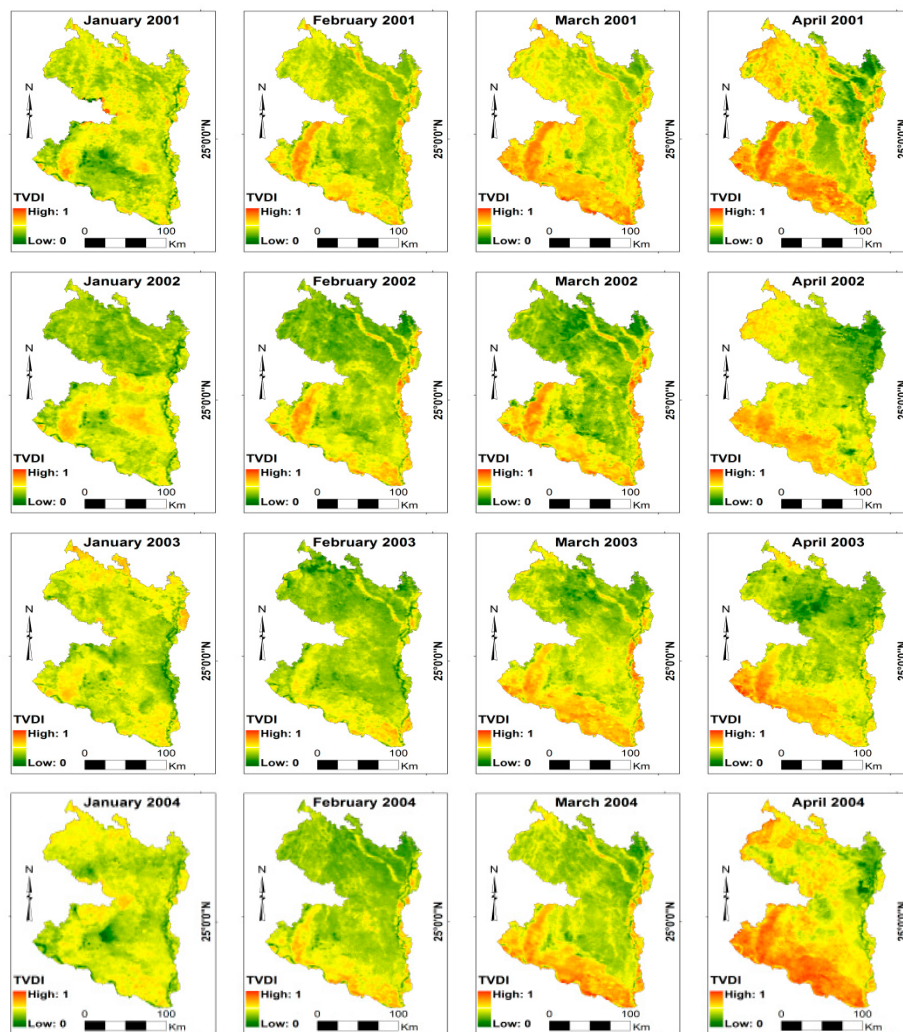

Figure S1A: Spatial and temporal variation of TVDI (stretching display).

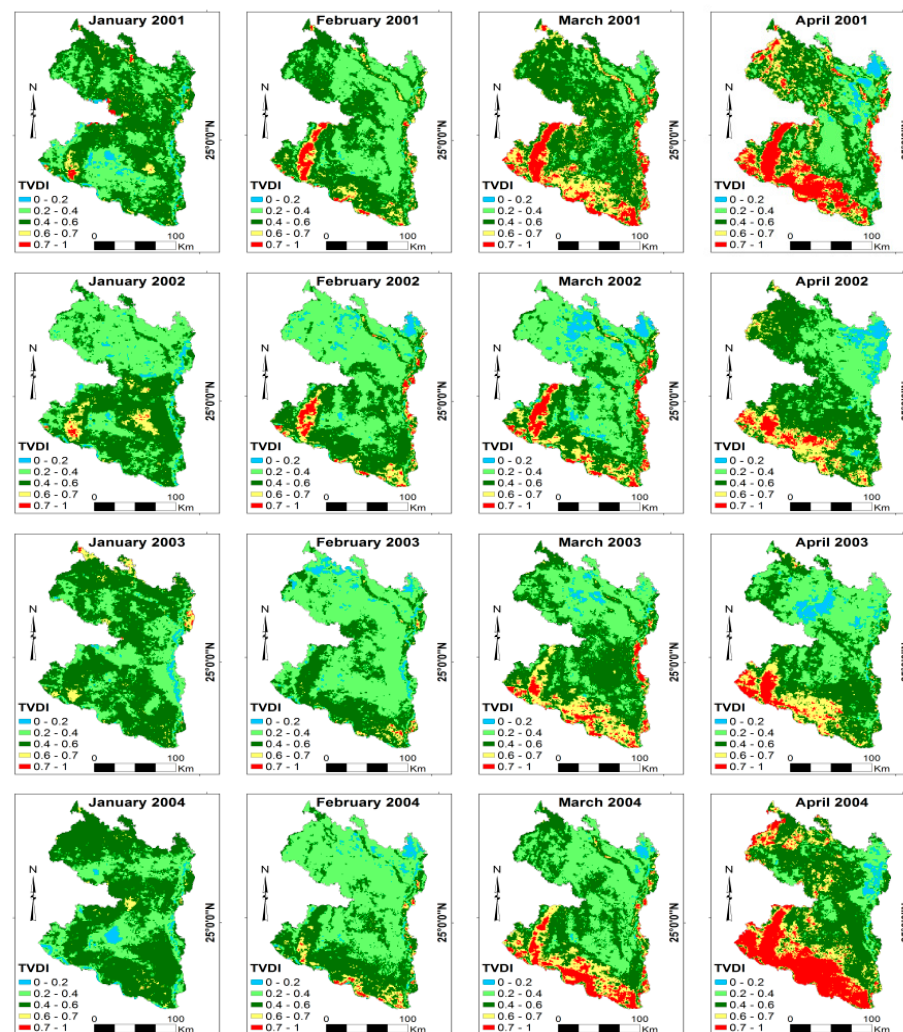

Figure S1B: Spatial and temporal variation of TVDI (classified display).

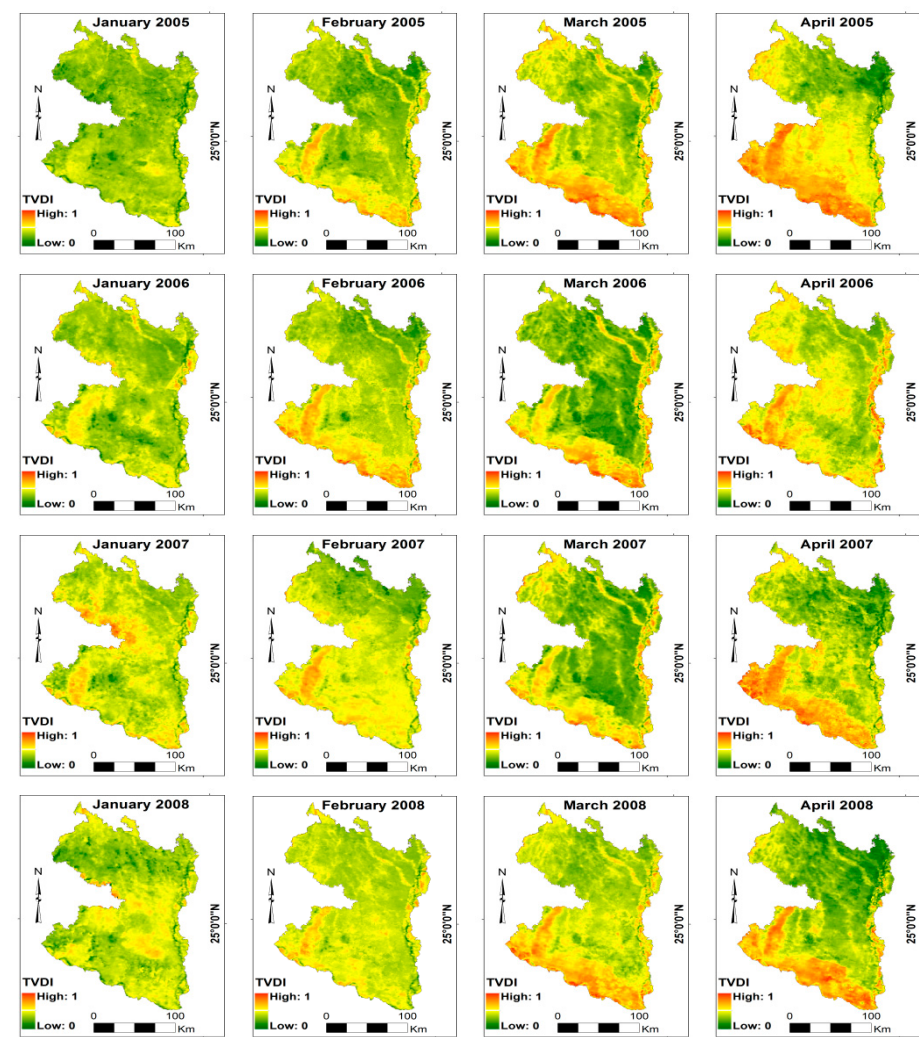

Figure S1A: (Continued).

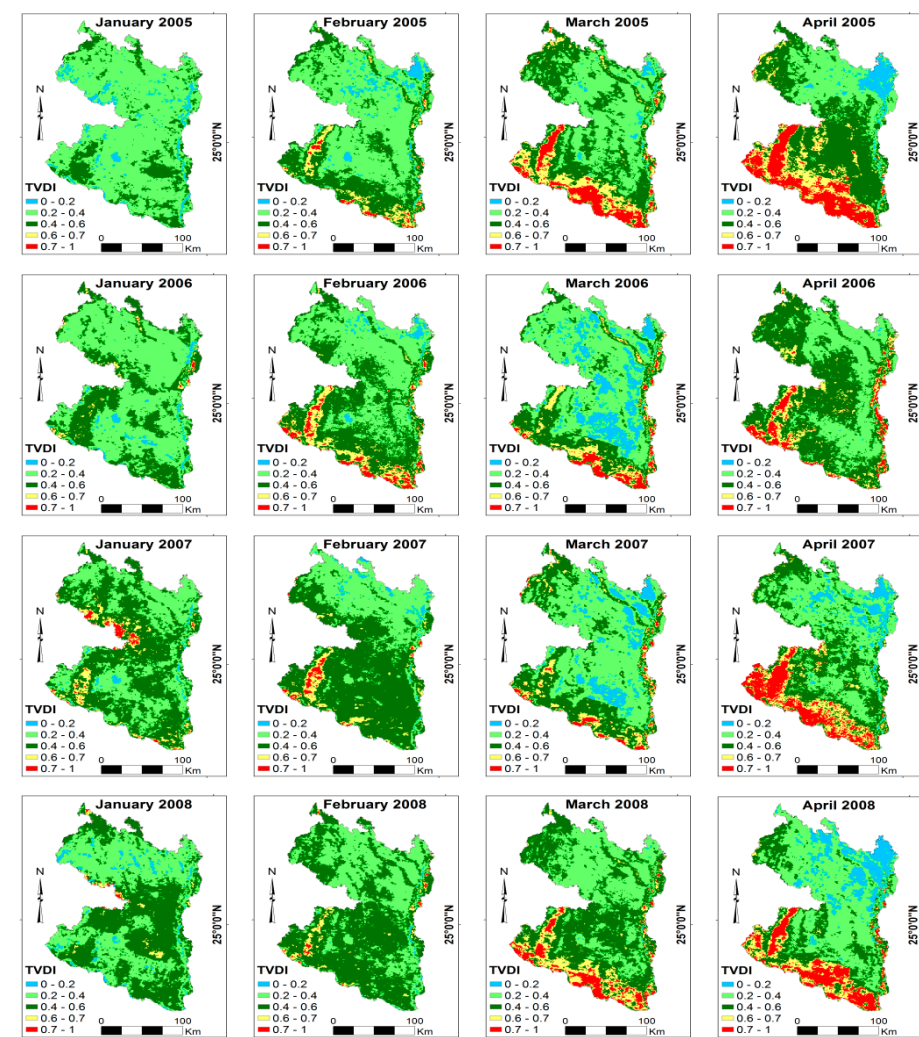

Figure S1B: (Continued).



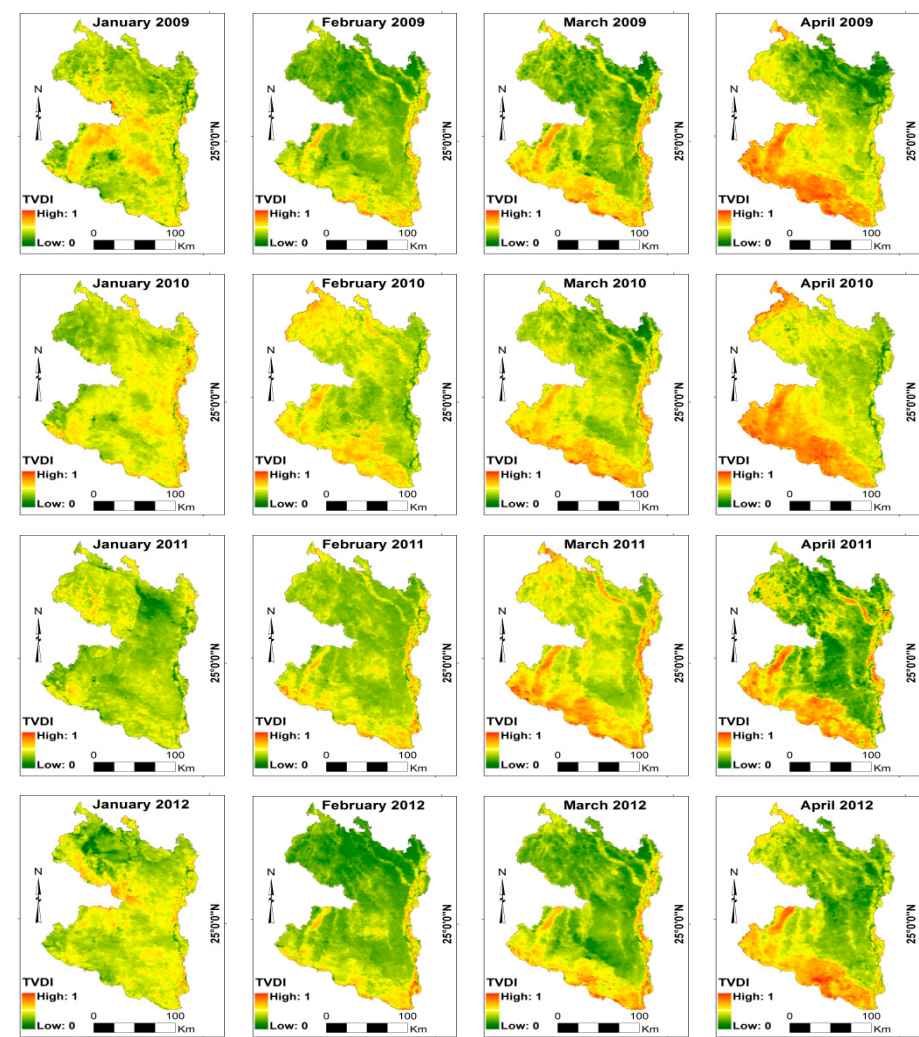

Figure S1A: (Continued).

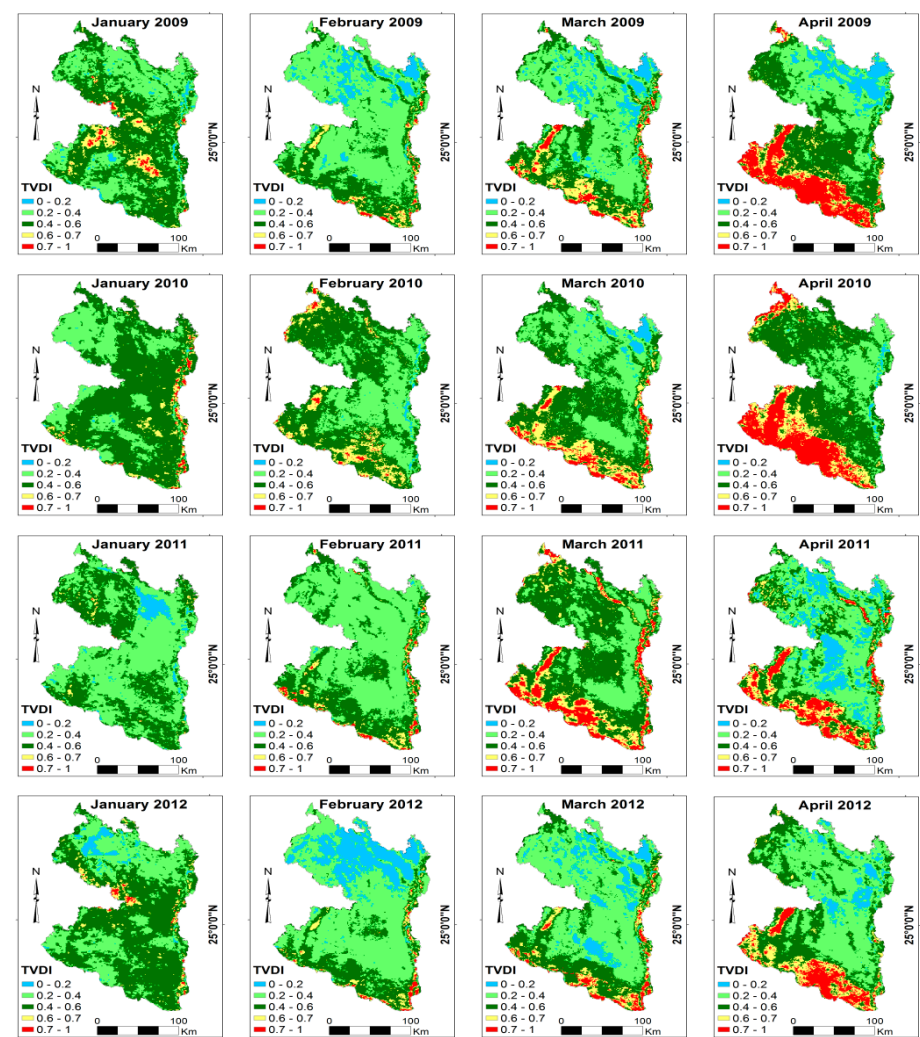

Figure S1B: (Continued).

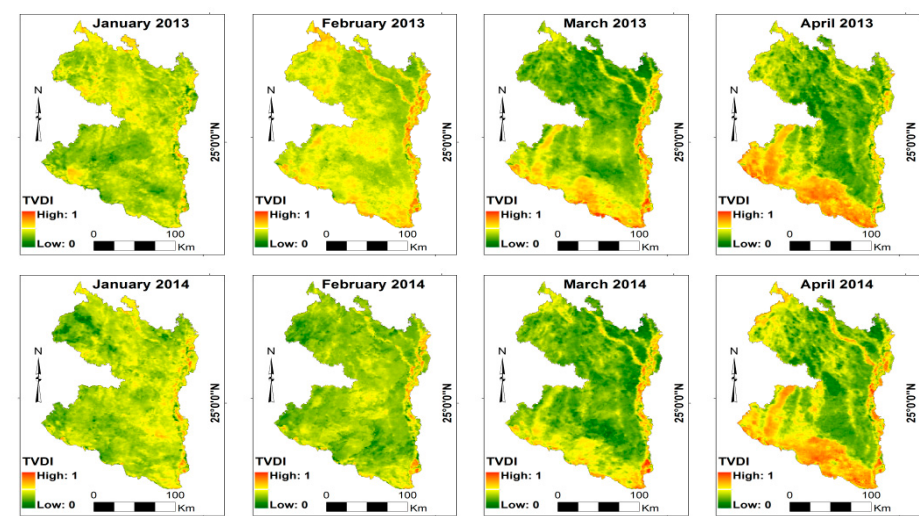

Figure S1A: (Continued).

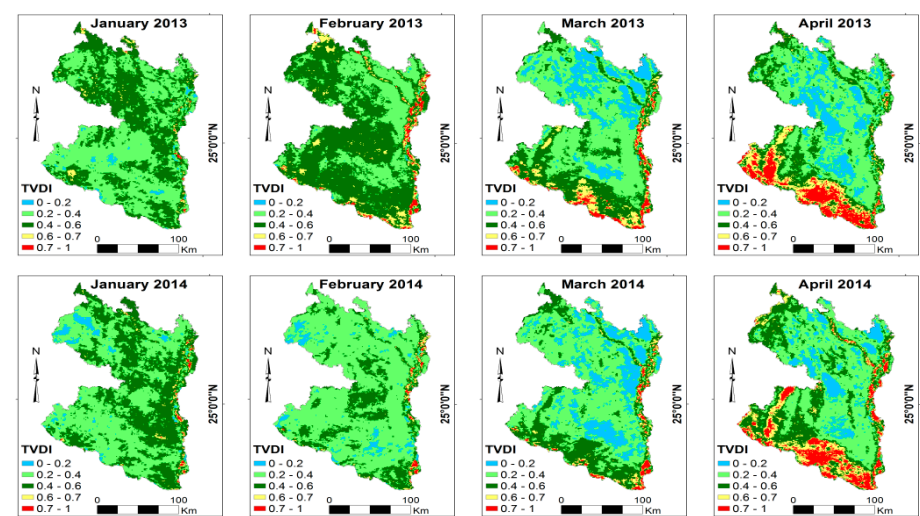

Figure S1B: (Continued).
